# Supplementary material for: Optimizing Protein Fiber Spinning to Develop Plant-Based Meat Analogs via Rheological and Physicochemical Analyses
Source: MDPI journal article supplement (doi:10.3390/foods12173161), 2023-08-23
Supplement: s1 [file s1]

### **Supporting Information for**

### **Utilization of fiber spinning extrusion to create fibrous plant-based meat analogs: Formulation, processing, and characterization**

Kartik Joshi<sup>1</sup>, Elnaz Shabani<sup>1</sup>, Hualu Zhou<sup>2</sup>, David Julian McClements<sup>2</sup>, Jay H. Park<sup>1\*</sup>

1. Department of Plastics Engineering, University of Massachusetts Lowell

2. Department of Food Science, University of Massachusetts Amherst

\*Corresponding author: Jay\_Park@uml.edu

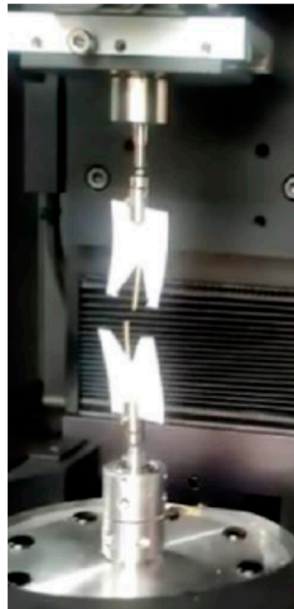

**Figure S1.** A representative tensile characterization of protein-based filaments using KLA T150 UTM.

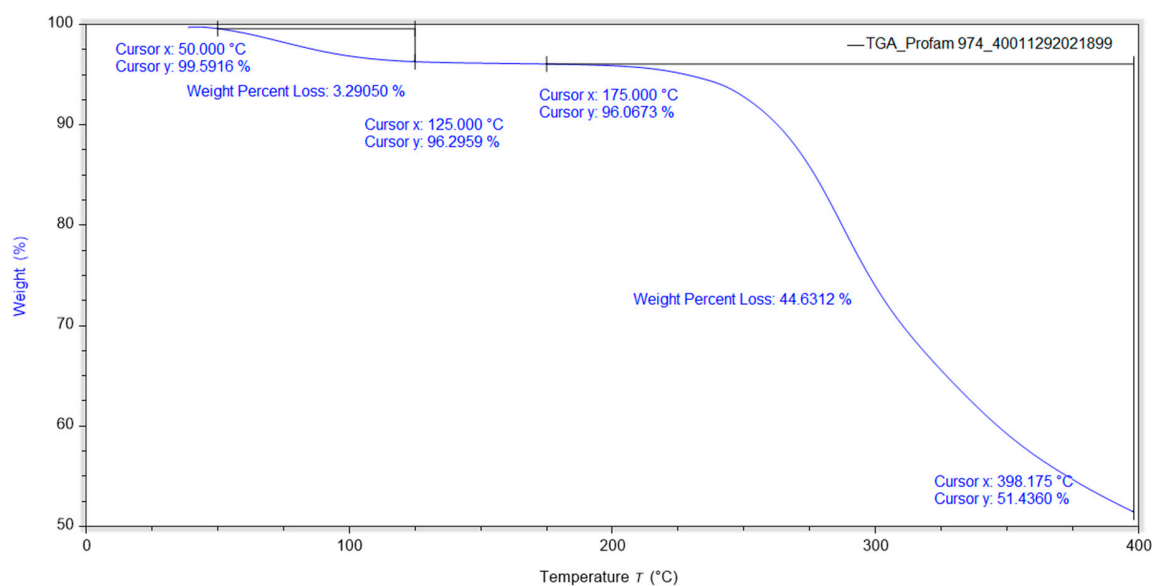

**Figure S2.** Thermogravimetric analysis (TGA) of Profam 974.

**Table S1.** TGA analysis experimental protocol

|           |                                |
|-----------|--------------------------------|
| Segment 1 | Initial Temperature 40.00 °C   |
| Segment 2 | Isothermal 1.00 min            |
| Segment 3 | Mark End of Cycle              |
| Segment 4 | Ramp 20.00 °C/min to 400.00 °C |
| Segment 5 | Mark End of Cycle              |

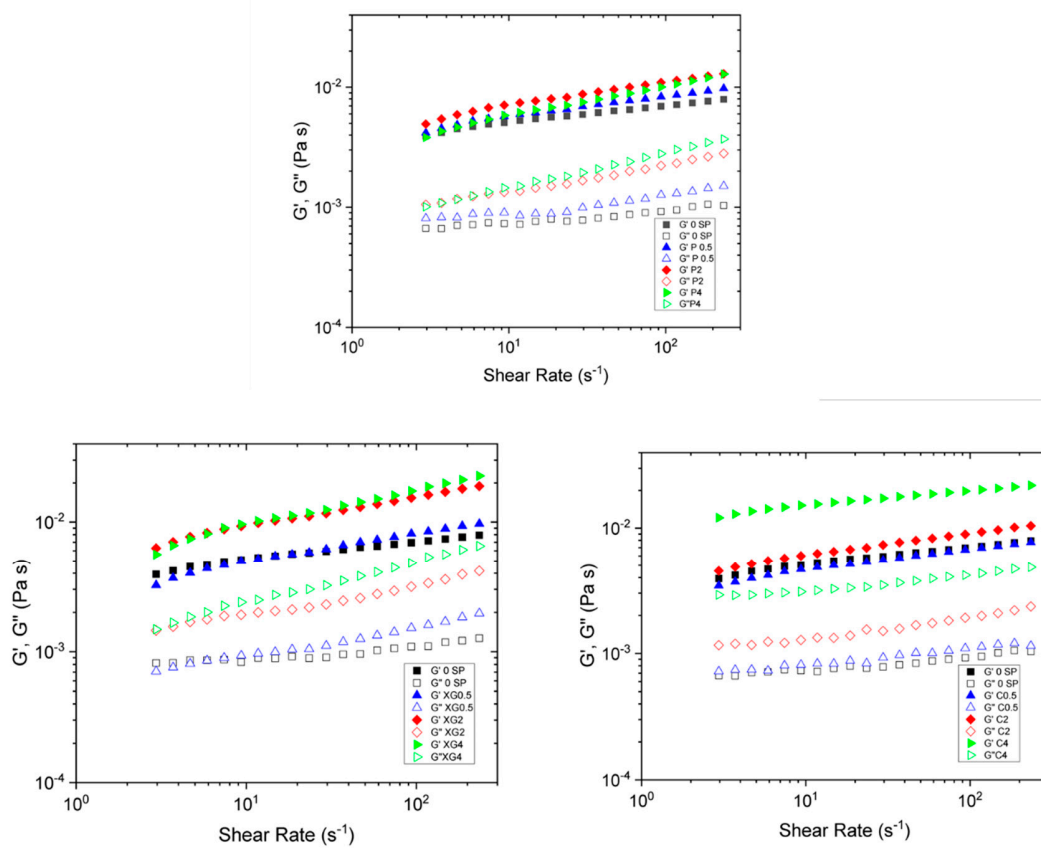

**Figure S3.** Storage and loss modulus with respect to shear rate are plotted for the formulations used in this study. The top plot shows results with varying concentrations of Pectin, while the bottom left shows those of Xanthan Gum, and the bottom right refers to Carrageenan.
